# Supplementary material for: Intravenous Idursulfase for the Treatment of Mucopolysaccharidosis Type II: A Systematic Literature Review
Source: MDPI journal article supplement (doi:10.3390/ijms25168573), 2024-08-06
Supplement: s1 [file s1]

## Supplementary Material

**Table S1.** Search strings for the systematic literature review.

Embase

| Search no. | Search                                                                                                                                                          | Result     | Type                          |
|------------|-----------------------------------------------------------------------------------------------------------------------------------------------------------------|------------|-------------------------------|
| 1          | ((mucopolysaccharidosis or MPS) adj (two or type 2 or II)) or (hunter* adj (syndrome or disease)).tw.                                                           | 2231       | MPS II                        |
| 2          | exp Hunter syndrome/dm, dt, th [Disease Management, Drug Therapy, Therapy]                                                                                      | 584        |                               |
| 3          | (treatment* or therap* or surg* or (gen* adj therap*) or (enzyme adj replacement) or ERT or Iduronate sulfatase).tw.                                            | 11 426 474 | Treatments                    |
| 4          | exp cell penetrating peptide/ or cargo technology.tw. or exp drug delivery system/                                                                              | 415 343    |                               |
| 5          | (1 or 2) and (3 or 4)                                                                                                                                           | 1501       |                               |
| 6          | case report/                                                                                                                                                    | 2 837 507  | Case reports from 2017 onward |
| 7          | (case study or case report or (case adj3 present*) or case series or clinical course).tw.                                                                       | 1 048 765  |                               |
| 8          | 6 or 7                                                                                                                                                          | 3 191 518  |                               |
| 9          | limit 8 to yr="2017 -Current"                                                                                                                                   | 874 125    |                               |
| 10         | 5 and 9                                                                                                                                                         | 160        | Boolean combinations          |
| 11         | 5 or 10                                                                                                                                                         | 1501       |                               |
| 12         | limit 11 to English language                                                                                                                                    | 1423       |                               |
| 13         | limit 12 to (books or chapter or conference abstract or "conference review" or editorial or erratum or letter or note or "review" or short survey or tombstone) | 810        |                               |
| 14         | 12 not 13                                                                                                                                                       | 613        |                               |
| 15         | limit 14 to (animals and animal studies)                                                                                                                        | 51         |                               |
| 16         | 14 not 15                                                                                                                                                       | 562        |                               |
| 17         | limit 16 to human                                                                                                                                               | 521        |                               |

MEDLINE

| Search no. | Search                                                                                                               | Result    | Type                          |
|------------|----------------------------------------------------------------------------------------------------------------------|-----------|-------------------------------|
| 1          | ((mucopolysaccharidosis or MPS) adj (two or type 2 or II)) or (hunter* adj (syndrome or disease)).tw.                | 1365      | MPS II                        |
| 2          | exp Hunter syndrome/dm, dt, th [Disease Management, Drug Therapy, Therapy]                                           | 274       |                               |
| 3          | (treatment* or therap* or surg* or (gen* adj therap*) or (enzyme adj replacement) or ERT or Iduronate sulfatase).tw. | 8 412 449 | Treatments                    |
| 4          | exp cell penetrating peptide/ or cargo technology.tw. or exp drug delivery system/                                   | 169 338   |                               |
| 5          | (1 or 2) and (3 or 4)                                                                                                | 668       |                               |
| 6          | case report/                                                                                                         | 2 313 692 | Case reports from 2017 onward |
| 7          | (case study or case report or (case adj3 present*) or case series or clinical course).tw.                            | 772 662   |                               |

|    |                                                                                                                                                                 |           |                      |
|----|-----------------------------------------------------------------------------------------------------------------------------------------------------------------|-----------|----------------------|
| 8  | 6 or 7                                                                                                                                                          | 2 602 815 |                      |
| 9  | limit 8 to yr="2017 -Current"                                                                                                                                   | 528 187   |                      |
| 10 | 5 and 9                                                                                                                                                         | 76        | Boolean combinations |
| 11 | 5 or 10                                                                                                                                                         | 668       |                      |
| 12 | limit 11 to English language                                                                                                                                    | 634       |                      |
| 13 | limit 12 to (books or chapter or conference abstract or "conference review" or editorial or erratum or letter or note or "review" or short survey or tombstone) | 99        |                      |
| 14 | 12 not 13                                                                                                                                                       | 535       |                      |
| 15 | limit 14 to (animals and animal studies)                                                                                                                        | 76        |                      |
| 16 | 14 not 15                                                                                                                                                       | 459       |                      |
| 17 | limit 16 to human                                                                                                                                               | 347       |                      |

## Cochrane Library

| Search no. | Search                                                                                                                                                          | Result    | Type                          |
|------------|-----------------------------------------------------------------------------------------------------------------------------------------------------------------|-----------|-------------------------------|
| 1          | ((mucopolysaccharidosis or MPS) adj (two or type 2 or II)) or (hunter* adj (syndrome or disease)).tw.                                                           | 81        | MPS II                        |
| 2          | exp Hunter syndrome/dm, dt, th [Disease Management, Drug Therapy, Therapy]                                                                                      | 3         |                               |
| 3          | (treatment* or therap* or surg* or (gen* adj therap*) or (enzyme adj replacement) or ERT or Iduronate sulfatase).tw.                                            | 1 149 192 | Treatments                    |
| 4          | exp cell penetrating peptide/ or cargo technology.tw. or exp drug delivery system/                                                                              | 8273      |                               |
| 5          | (1 or 2) and (3 or 4)                                                                                                                                           | 69        | Case reports from 2017 onward |
| 6          | case report/                                                                                                                                                    | 4         |                               |
| 7          | (case study or case report or (case adj3 present*) or case series or clinical course).tw.                                                                       | 14 590    |                               |
| 8          | 6 or 7                                                                                                                                                          | 14 593    |                               |
| 9          | limit 8 to yr="2017 -Current"                                                                                                                                   | 6129      |                               |
| 10         | 5 and 9                                                                                                                                                         | 0         | Boolean combinations          |
| 11         | 5 or 10                                                                                                                                                         | 69        |                               |
| 12         | limit 11 to English language                                                                                                                                    | 65        |                               |
| 13         | limit 12 to (books or chapter or conference abstract or "conference review" or editorial or erratum or letter or note or "review" or short survey or tombstone) | 4         |                               |
| 14         | 12 not 13                                                                                                                                                       | 61        |                               |

\*(asterisk) was used to search for multiple variants of a word (i.e., singular/plural/conjugations etc.) all at once.  
ERT—enzyme replacement therapy; MPS—mucopolysaccharidosis.
